# Supplementary material for: SHP-2 and PD-1-SHP-2 signaling regulate myeloid cell differentiation and antitumor responses
Source: PubMed Central journal article supplement (PMC9810534; doi:10.1038/s41590-022-01385-x), 2022-12-29
Supplement: 41590_2022_1385_MOESM1_ESM.pdf [file 41590_2022_1385_MOESM1_ESM.pdf]

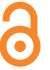

---

# **SHP-2 and PD-1-SHP-2 signaling regulate myeloid cell differentiation and antitumor responses**

---

In the format provided by the authors and unedited

---

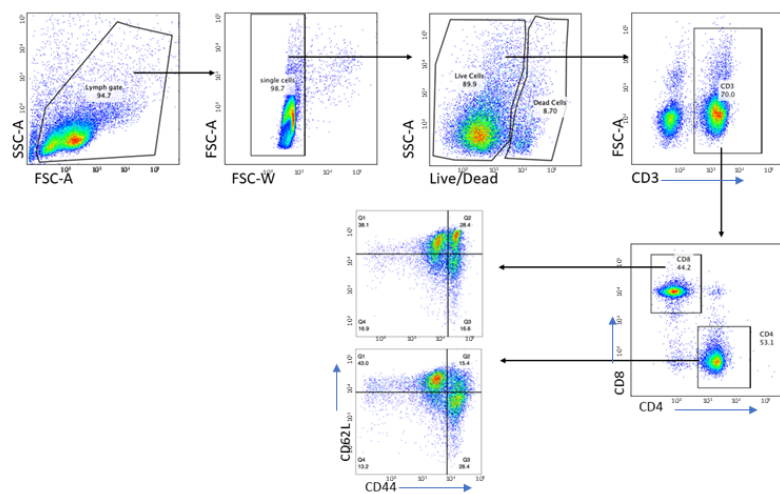

**Supplementary Fig. 1. Gating strategy of activated CD4<sup>+</sup> and CD8<sup>+</sup> T cells in spleen and tumor draining lymph nodes.** After excluding doublets and dead cells, CD3<sup>+</sup> T cells were divided into CD4<sup>+</sup> and CD8<sup>+</sup> T cells. Within the CD4<sup>+</sup> and CD8<sup>+</sup> gates, expression of CD44 and CD62L was assessed. CD4<sup>+</sup> and CD8<sup>+</sup> in the CD44<sup>hi</sup>CD62L<sup>low</sup> gate were defined as T effector (T<sub>EF</sub>), whereas cells in the CD44<sup>lo</sup>CD62L<sup>hi</sup> gate were defined as central memory (T<sub>CM</sub>)-like cells.

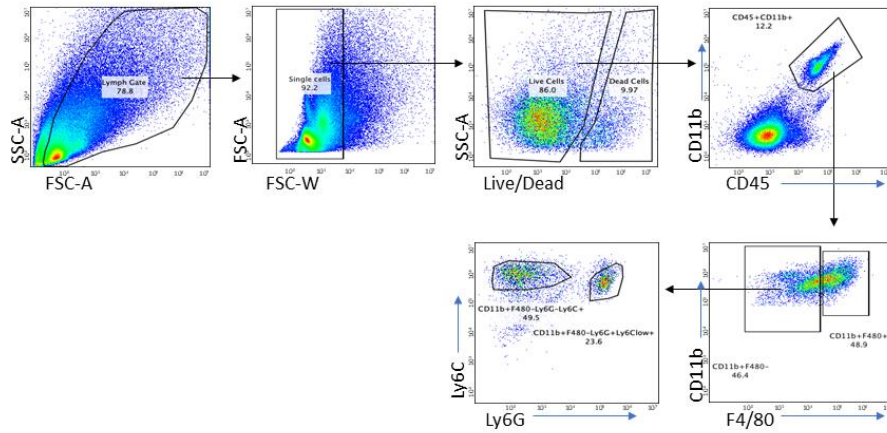

**Supplementary Fig. 2: Gating strategy of myeloid subsets in the tumor site.** After excluding doublets and dead cells, myeloid cells were identified as CD45<sup>+</sup>CD11b<sup>+</sup>. Within the myeloid cell population, macrophages were identified as CD11b<sup>+</sup>F4/80<sup>+</sup>, M-MDSCs as CD11b<sup>+</sup>F4/80<sup>-</sup>Ly6C<sup>hi</sup>Ly6G<sup>-</sup> and PMN-MDSCs as CD11b<sup>+</sup>F4/80<sup>-</sup>Ly6C<sup>lo</sup>Ly6G<sup>+</sup>. The same gating strategy was used for identification of myeloid subsets in the spleen.

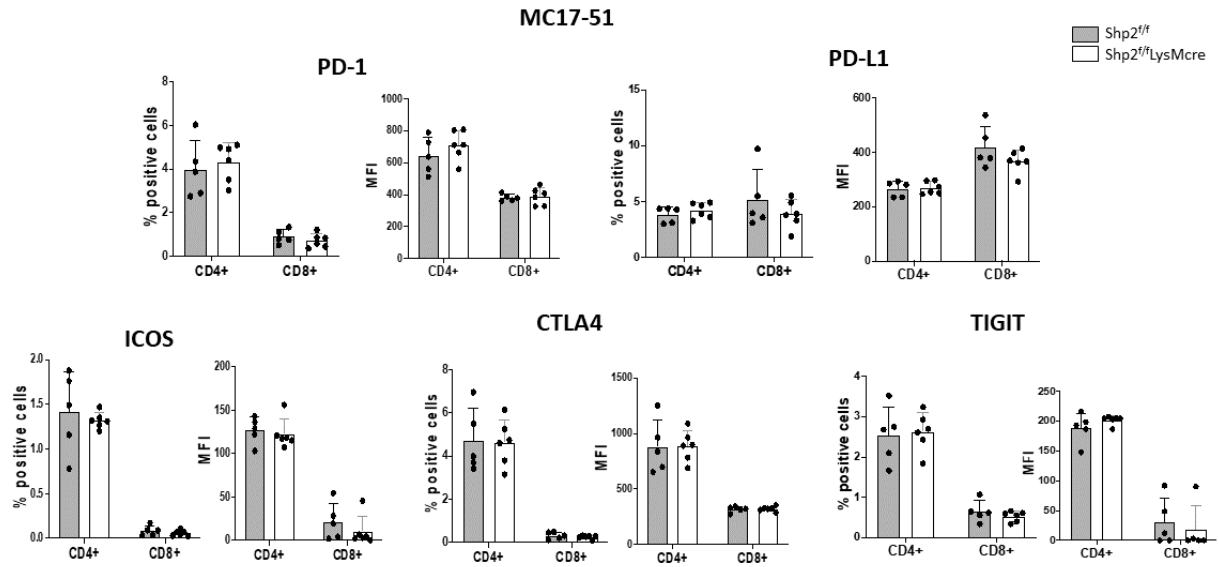

**Supplementary Fig. 3. Myeloid-specific SHP-2 deletion does not affect the expression of co-inhibitory receptors in CD4<sup>+</sup> or CD8<sup>+</sup> T cells.** Expression of the indicated markers was assessed by flow cytometry in T cells isolated from TDLN of *Shp2<sup>fl/fl</sup>* and *Shp2<sup>fl/fl</sup>LysM<sup>cre</sup>* mice bearing MC17-51 tumors. Representative plots and mean percentages  $\pm$  SD in *Shp2<sup>fl/fl</sup>* mice (grey bar) and *Shp2<sup>fl/fl</sup>LysM<sup>cre</sup>* (black bars) are shown. Results are from one representative of four independent experiments with n=5 mice per group.

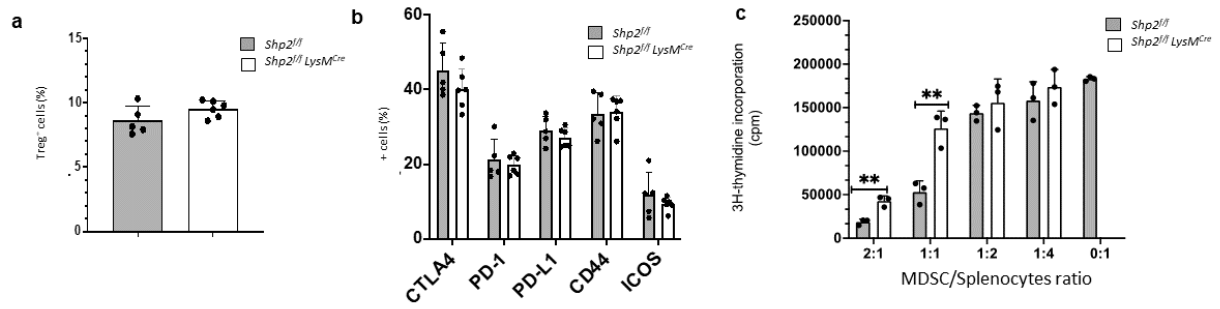

**Supplementary Fig. 4. (a, b) Myeloid-specific SHP-2 deletion does not affect the expansion or activation of Treg cells.** Tregs were identified by flow cytometry in TDLN of *Shp2<sup>fl/fl</sup>* and *Shp2<sup>fl/fl</sup>LysM<sup>Cre</sup>* mice bearing MC17-51 tumors **(a)**. The expansion of the indicated markers on Treg cells was examined **(b)**. Representative results from one of five independent experiments with n=4 to 6 mice per group are shown. **(c) Diminished suppressive activity of M-MDSC isolated from *Shp2<sup>fl/fl</sup>LysM<sup>Cre</sup>* tumor-bearing mice.** CD11b<sup>+</sup>Ly6C<sup>hi</sup>Ly6G<sup>-</sup> monocytic (M-MDSC) cells were isolated from *Shp2<sup>fl/fl</sup>* and *Shp2<sup>fl/fl</sup>LysM<sup>Cre</sup>* MC17-51 tumor-bearing mice and cultured at various ratios with OTI splenocytes (2x10<sup>5</sup>cells/well) stimulated with OVA<sub>257-264</sub> as described in Methods. Mean ± SEM of cpm values are shown. Results are representative of two separate experiments using MDSC from n=3 mice per group. (\*\*p< 0.01).

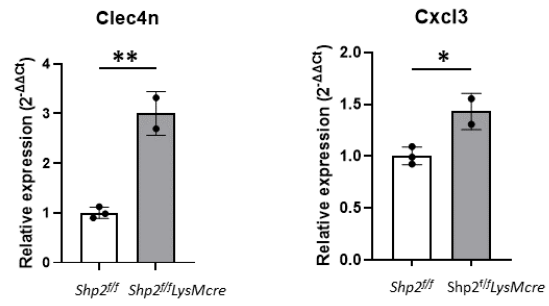

**Supplementary Fig. 5. RNaseq validation example.** TAMs were isolated from *Shp2<sup>fl/fl</sup>* and *Shp2<sup>fl/fl</sup>LysMcre* tumor-bearing mice on day 15 and expression of mRNA for the indicated genes was examined by qPCR. Results shown are from one of four separate experiments with n=2-3 mice per group. (\*p< 0.05, \*\*p< 0.01).
