# Supplementary material for: SHP-2 and PD-1-SHP-2 signaling regulate myeloid cell differentiation and antitumor responses
Source: PubMed Central journal article supplement (PMC9810534; doi:10.1038/s41590-022-01385-x), 2022-12-29
Supplement: 41590_2022_1385_MOESM7_ESM.pdf [file 41590_2022_1385_MOESM7_ESM.pdf]

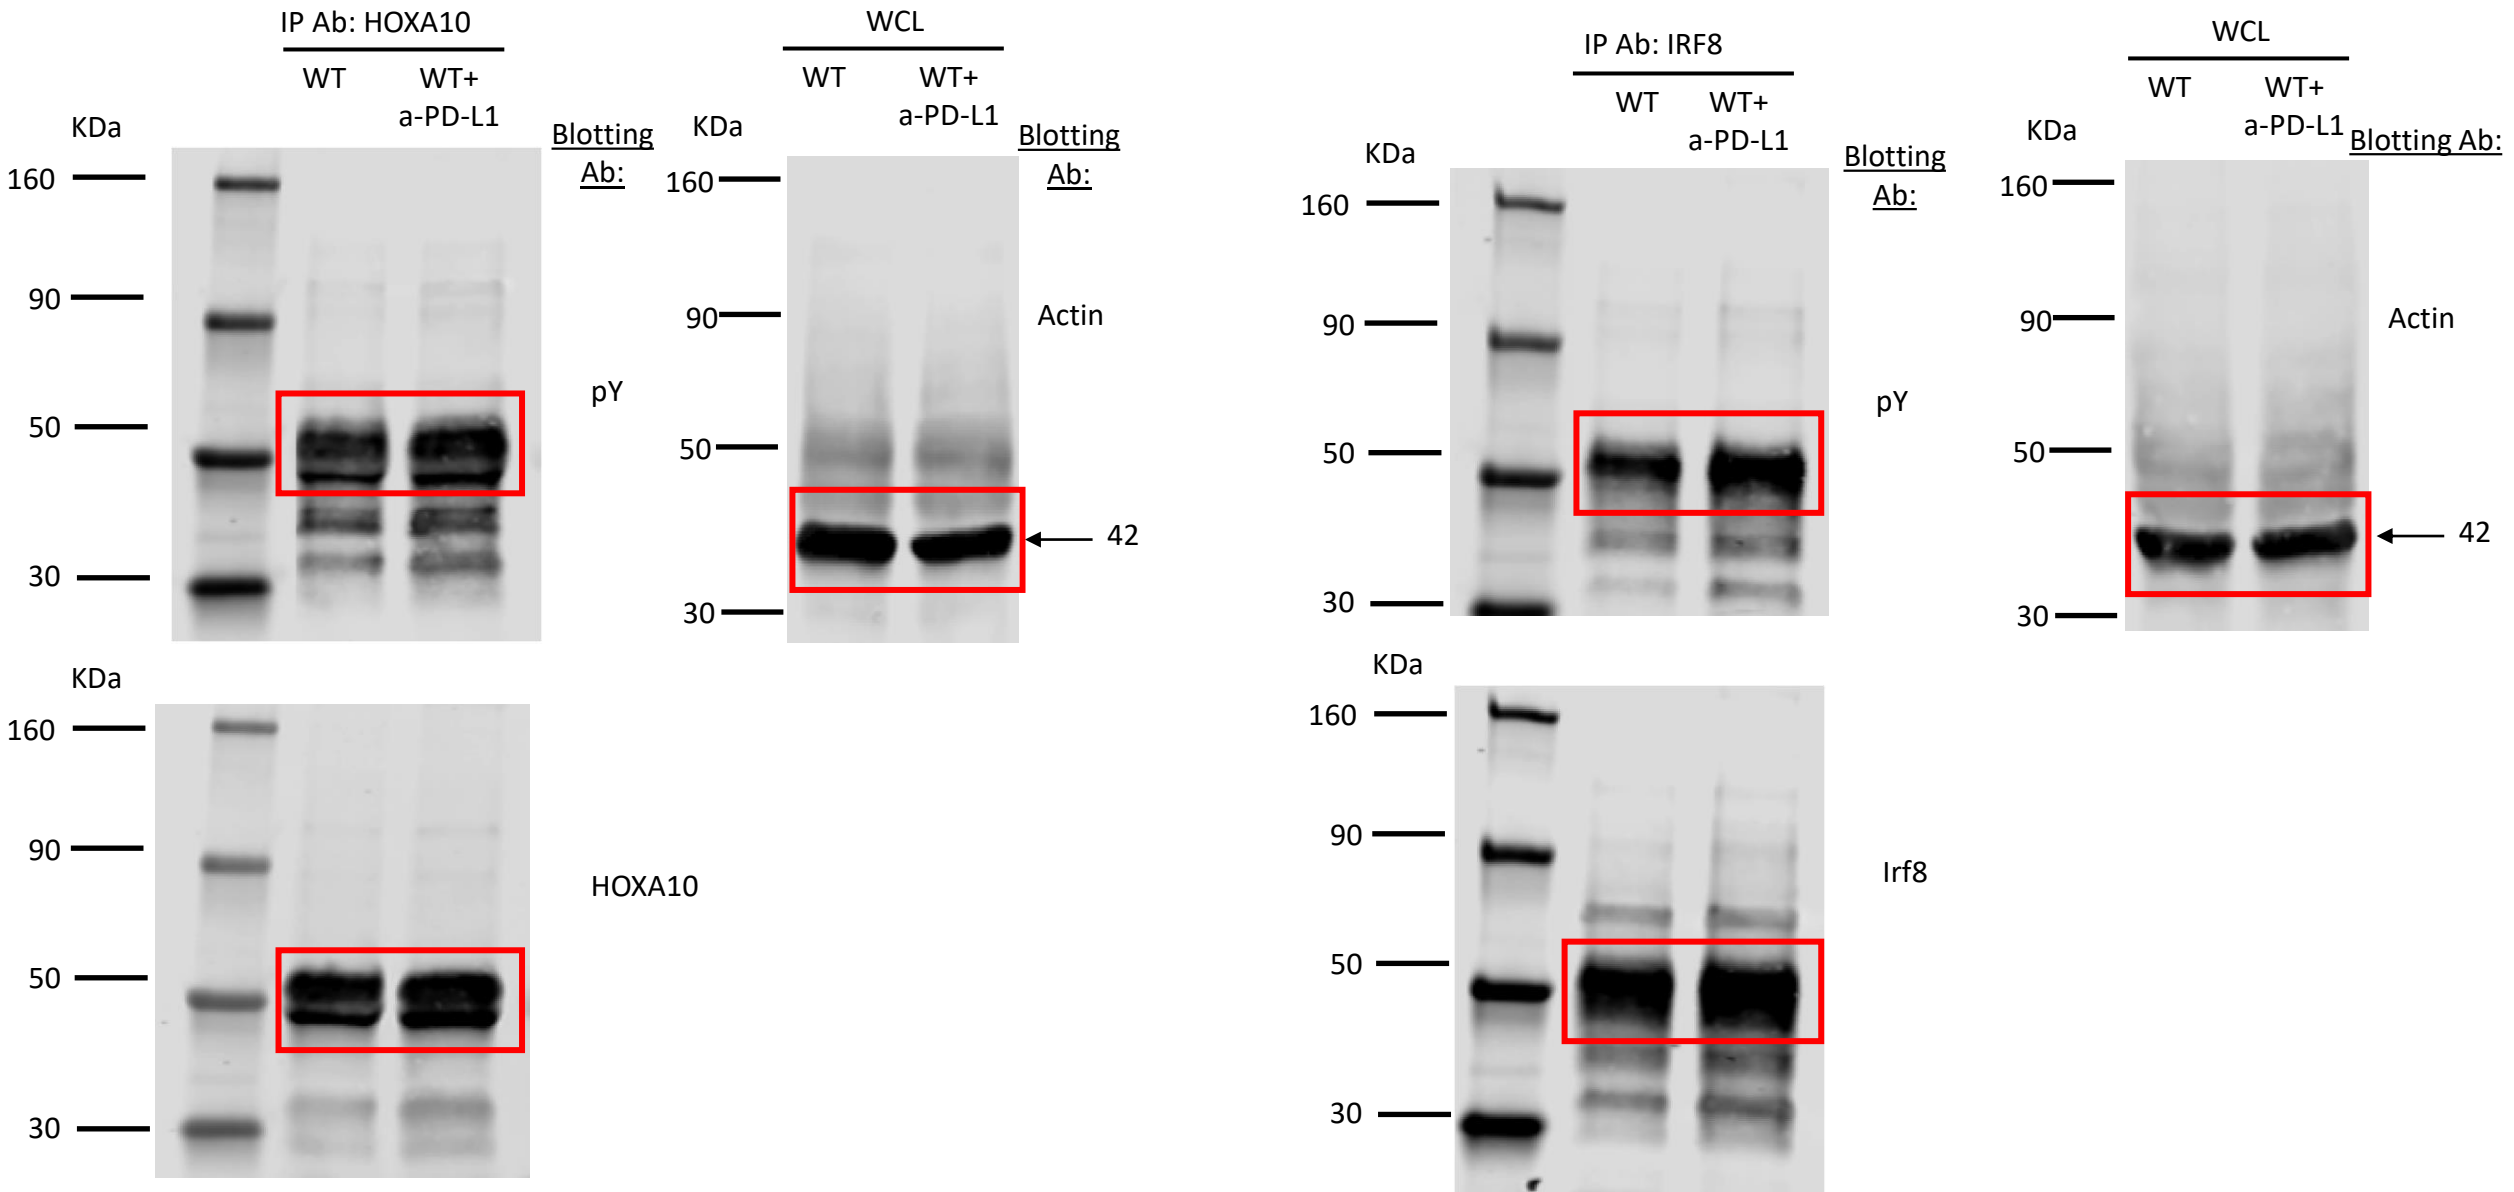

Unprocessed blots Extended Data Fig. 7
